# Supplementary material
Source: publisher figshare collection journal article supplement (https://asha.figshare.com/articles/dataset/_/6030779)
Supplement: Supplementary file 1 [file 1]

**Supplemental Material S8.** Comparison of the individual patient performance to the performance of the control group in Experiment 2. \*Significant difference. (\*)Marginally significant difference.

| Patient | Experiment 2 |              |            |         |
|---------|--------------|--------------|------------|---------|
|         | Unergative   | Unaccusative | Transitive | Overall |
| SD2     | 0.005*       | 0.002*       | 0.000*     | 0.001*  |
| SD3     | 0.000*       | 0.002*       | 0.000*     | 0.000*  |
| SD4     | 0.335        | 0.021*       | 0.219      | 0.269   |
| SD5     | 0.005*       | 0.021*       | 0.026*     | 0.011*  |
| SD6     | 0.065(*)     | 0.407        | 0.219      | 0.269   |
| SD7     | 0.065(*)     | 0.099        | 0.219      | 0.122   |
