# Supplementary material
Source: publisher figshare collection journal article supplement (https://asha.figshare.com/articles/dataset/_/6030779)
Supplement: Supplementary file 3 [file 1]

**Supplemental Material S5.** Overview of the material used in Experiment 2. *N* = number of items per condition.

| <b>Tense</b>      | <b>Verb Class</b> |                     |                   |
|-------------------|-------------------|---------------------|-------------------|
|                   | <b>Unergative</b> | <b>Unaccusative</b> | <b>Transitive</b> |
| Past perfective   | <i>N</i> = 1      | <i>N</i> = 5        | <i>N</i> = 3      |
| Past imperfective | <i>N</i> = 5      | <i>N</i> = 1        | <i>N</i> = 3      |
