# Supplementary material
Source: publisher figshare collection journal article supplement (https://asha.figshare.com/articles/dataset/_/6030779)
Supplement: Supplementary file 4 [file 1]

### Supplemental Material S3. Verbs used in each verb class.

| Unergative        | Unaccusative     | Transitive                               |
|-------------------|------------------|------------------------------------------|
| γavγizo (= bark)  | aniyo (= open)   | diavazo efimerida<br>(= read newspaper)  |
| trexo (=run)      | vrazo (= boil)   | mazevo luludia<br>(= collect flowers)    |
| xorevo (= dance)  | pefto (= fall)   | potizo to fito<br>(= water the plant)    |
| γelao (= laugh)   | kleino (= close) | tinazo tin kuverta<br>(= shake the rug)  |
| kolybao (= swim)  | kylao (= roll)   | lyno enan kompo<br>(= untie a knot)      |
| trayuðao (= sing) | spao (= break)   | forao to sakaki<br>(= put on the jacket) |
