# Supplementary material
Source: publisher figshare collection journal article supplement (https://asha.figshare.com/articles/dataset/_/6030779)
Supplement: Supplementary file 5 [file 1]

## **Supplemental Material S6.** Comparisons of the individual scores to the scores of the control group.

For the comparison of each individual with the control group in each task separately, we used the software SINGLIMS.EXE (1998). In Supplemental Material S7 and S8, we report the (one-tailed)  $p$  values for the difference of each participant with respect to each class separately and with respect to the overall score in Experiment 1 and Experiment 2, respectively. For Experiment 1, all patients except for SD6 differed from the control group in the overall score, and SD1 presented marginal difference from the group. Concerning unergatives, only three patients differed from the control group (SD1, SD2, and SD3). This is also the case for unaccusatives, with only three patients differing from the control group (SD2, SD3, and SD4). For transitive verbs, all patients differed from the control group. This is in accordance with the group results, which showed a marginal difference between the control groups for unergative and transitive and a large difference for unaccusatives. Interestingly, only SD2 and SD3 were impaired across verb classes.

Concerning Experiment 2, recall that there was significant difference between the two groups for the overall score, for unergatives and unaccusatives. The comparison of individuals to the controls showed that only three patients had significantly lower performance than the control group in the overall score (SD2, SD3, and SD5). Concerning unergative verbs, only SD4 performed within the normal range, whereas all other patients performed either significantly worse (SD2, SD3, and SD5) or marginally within the normal range (SD6 and SD7). All patients performed worse than the control group for unaccusative verbs (except for SD6 and SD7). This indicates that most of the patients fall in the group pattern for these two verb classes. Finally, for transitives, only three patients performed worse than the control group (SD2, SD3, and SD5), which probably explains why the difference failed to reach significance. In sum, SD2, SD3, and SD5 seem to be consistently challenged by the task.

Following this, we tested whether each patient differed from the control group in terms of the difference between the scores in each task. We used the RSDT\_ES.EXE (2005). In Supplemental Material S9, we present the two-tailed  $p$  values for the comparisons, as we are interested in whether there was a change in the performance at all. For both groups, there was not a difference between the two tasks with respect to the overall scores. At the individual level, only SD3 differed significantly from the control group, which means that her performance dropped to a greater extent than in the control group. SD2 and SD7 differed marginally from the control group with one difference: SD2 was impaired in both tasks, whereas SD7 had a good performance in both tasks. The difference for all other patients was within the normal range. Concerning each verb class separately, recall that there was no difference for the control group for none of the classes between the two tasks. This was the case also in the SD group with the exception of unaccusative verbs. At the individual level, the difference in the scores between the two experiments was significantly different from that of the control group for SD3 and SD5 for unergatives. For unaccusative verbs, there was no significant difference for none of the patients. This is probably because the difference for each participant individually is minimal but all of them scored worse in Experiment 2 than in Experiment 1, which caused the effect at the group level. Finally, for transitives, there was significant difference for patients SD2, SD3, and SD7.

## **References**

- Crawford, J. R., Garthwaite, P. H., & Porter, S. (2010). Point and interval estimates of effect sizes for the case-controls design in neuropsychology: Rationale, methods, implementations, and proposed reporting standards. *Cognitive Neuropsychology*, 27, 245–260.
- Revised Standardized Difference Test (upgraded to include estimates of effect size) [Computer software]. (2005). Retrieved from <http://homepages.abdn.ac.uk/j.crawford/pages/dept/SingleCaseMethodsComputerPrograms.HTM>

SINGLIMS.EXE: Point estimate and confidence limits on the abnormality of a test score [Computer software]. (2002). Retrieved from <http://homepages.abdn.ac.uk/j.crawford/pages/dept/SingleCaseMethodsComputerPrograms.HTM>
