# Supplementary material
Source: publisher figshare collection journal article supplement (https://asha.figshare.com/articles/dataset/_/6030779)
Supplement: Supplementary file 6 [file 1]

**Supplemental Material S7.** Comparison of the individual patient performance to the performance of the control group in Experiment 1. \*Significant difference. (\*)Marginally significant difference.

| Patient | Experiment 1 |              |            |          |
|---------|--------------|--------------|------------|----------|
|         | Unergative   | Unaccusative | Transitive | Overall  |
| SD1     | 0.015*       | 0.253        | 0.034*     | 0.055(*) |
| SD2     | 0.002*       | 0.002*       | 0.000*     | 0.000*   |
| SD3     | 0.015*       | 0.000*       | 0.034*     | 0.001*   |
| SD4     | 0.165        | 0.015*       | 0.034*     | 0.015*   |
| SD5     | 0.165        | 0.165        | 0.002*     | 0.015*   |
| SD6     | 0.253        | 0.165        | 0.034*     | 0.193    |
| SD7     | 0.165        | 0.165        | 0.000*     | 0.005*   |
