# Supplementary material
Source: publisher figshare collection journal article supplement (https://asha.figshare.com/articles/dataset/_/6030779)
Supplement: Supplementary file 8 [file 1]

**Supplemental Material S9.** Comparison of the individual patients to the control group with respect to the difference in the scores between the tasks. \*Significant difference.  
(\*)Marginally significant difference.

| <b>Difference between Exp. 1 and Exp. 2</b> | <b>Unergative</b> | <b>Unaccusative</b> | <b>Transitive</b> | <b>Overall</b> |
|---------------------------------------------|-------------------|---------------------|-------------------|----------------|
| SD2                                         | 0.9               | 0.5                 | 0.05*             | 0.046(*)       |
| SD3                                         | 0.001*            | 0.6                 | 0.008*            | 0.022*         |
| SD4                                         | 0.34              | 0.8                 | 0.09              | 0.09           |
| SD5                                         | 0.05(*)           | 0.23                | 0.26              | 0.66           |
| SD6                                         | 0.09              | 0.67                | 0.46              | 0.8            |
| SD7                                         | 0.47              | 0.65                | 0.01*             | 0.06(*)        |
